# Supplementary material
Source: MDPI journal article supplement (https://www.mdpi.com/1999-4907/9/4/175)
Supplement: s1 [file s1]

**Supplementary materials**

**Figure S1.** Effect of day extension with red (R), far-red (FR) and blue (B) from light emitting diodes (LEDs) as compared to short days (SD: no day extension) on % plants with terminal bud in *Abies lasiocarpa* grown under A) 18 or 22 °C (experiment 1) and B) 18 or 24 °C (experiment 2). The values represent the average of A) 16-19 plants and B) 19 plants per treatment. Two-way analyses of variance for the entire time courses are shown in Table S6.

**Figure S2.** Effect of day extension with different light quality treatments from light emitting diodes (LEDs) as compared to short days (SD: no day extension) on % plants with terminal bud in *Abies lasiocarpa* grownunder 18 or 24 °C. A) Far red (FR), red (R), R:FR ratio 0.5, 1 or 2 (experiment 3). B) FR, R, R:FR ratio 0.1, 0.2 or 0.5 (experiment 4). The corresponding phytochrome photostationary state values are shown in brackets. The values represent the average of 17 plants. Two-way analyses of variance for the entire time courses are shown in Table S7.

**Figure S3.** Effect of day extension with red (R), far-red (FR) or blue (B) light from light emitting diodes (LEDs) as compared to short days (SD: no day extension) on terminal bud burst in *Abies lasiocarpa* grown under 18 or 24 °C for 50 days (experiment 2), before transfer to long days at 18 °C (conditions as before start of the treatments). The values represent the average % plants with buds of 19 plants. Two- way analyses of variance for the entire time courses are shown in Table S8.

**Table S1.** Two-way ANOVA tables for study of effect of day extension with red, far-red or blue light from light emitting diodes (LEDs) and short days (SD: no day extension) on shoot elongation in a time course in *Abies lasiocarpa* seedlings grown under A) 18 or 22 °C (experiment 1) and B) 18 or 24 °C (experiment 2) (results shown in Figure 1). A linear model was applied using the time within each individual plant as random effect. Since there was no significant interaction, the interaction term was omitted from the analysis. A) n=16-19 plants, B) n=19 plants per treatment.

| A) Analysis of Deviance Table (Type III Wald chisquare tests) | | | | |
| --- | --- | --- | --- | --- |
|  | Chisq | Df | Pr(>Chisq) |  |
| (Intercept) | 0.7069 | 1 | 0.40049 |
| Temperature | 3.3358 | 1 | 0.06779 | . |
| Day extension | 4.4097 | 3 | 0.22048 |  |

| B) Analysis of Deviance Table (Type III Wald chisquare tests) | | | | |
| --- | --- | --- | --- | --- |
|  | Chisq | Df | Pr(>Chisq) |  |
| (Intercept) | 3.5694 | 1 | 0.05885 | . |
| Temperature | 1.6332 | 1 | 0.20126 |  |
| Day extension | 9.6026 | 3 | 0.02226 | * |
| Signif. codes: 0 ‘***’ 0.001 ‘**’ 0.01 ‘*’ 0.05 ‘.’ 0.1 ‘ ’ 1 | | | | |

**Table S2.** Two-way ANOVA tables for study of effect of day extension with A) far red, red or red: far-red ratio 0.5, 1 or 2 (experiment 3) and B) far-red, red or red: far-red ratio 0.1, 0.2 or 0.5 (experiment 4) from light emitting diodes (LEDs) and short days (SD: no day extension) on shoot elongation in a time course in *Abies lasiocarpa* seedlings grown under 18 or 24 °C (results shown in Figure 2). A linear model was applied using the time within each individual plant as random effect. Since there was no significant interaction in A, the interaction term was omitted from the analysis. n=17 plants per treatment.

| A) Analysis of Deviance Table (Type III Wald chisquare tests) | | | | |
| --- | --- | --- | --- | --- |
|  | Chisq | Df | Pr(>Chisq) |  |
| (Intercept) | 3.2164 | 1 | 0.0729 | . |
| Temperature | 23.7351 | 1 | 1.11E-06 | *** |
| Day extension | 49.9031 | 5 | 1.45E-09 | *** |

| B) Analysis of Deviance Table (Type III Wald chisquare tests) | | | | |
| --- | --- | --- | --- | --- |
|  | Chisq | Df | Pr(>Chisq) |  |
| (Intercept) | 2.1219 | 1 | 0.145205 |  |
| Temperature | 6.8736 | 1 | 0.008748 | ** |
| Day extension | 16.5878 | 5 | 0.005352 | ** |
| Temperature: Day extension | 16.656 | 5 | 0.005201 | ** |
| Signif. codes: 0 ‘***’ 0.001 ‘**’ 0.01 ‘*’ 0.05 ‘.’ 0.1 ‘ ’ 1 | | | | |

**Table S3.** Two-way ANOVA tables for study of effect of day extension with red, far-red or blue light from light emitting diodes and short days (SD: no day extension) on terminal bud stages in a time course in *Abies lasiocarpa* seedlings grown under A) 18 or 22 °C (experiment 1) and B) 18 or 24 °C (experiment 2) (results shown in Figure 3) . Bud stage 0 = growing shoot tip (no presence of bud), 1 = green bud, 2 = brown bud. A generalized linear model was applied using the time within each individual plant as random effect. Since there was no significant interaction, the interaction term was omitted from the analysis. A) n=16-19 plants, B) n=19 plants per treatment.

| A) Analysis of Deviance Table (Type III Wald chisquare tests) | | | | |
| --- | --- | --- | --- | --- |
|  | Chisq | Df | Pr(>Chisq) |  |
| (Intercept) | 0.3401 | 1 | 5.60E-01 |  |
| Temperature | 0.3047 | 1 | 0.5809 |  |
| Day extension | 22.6986 | 3 | 4.67E-05 | *** |
|  |  |  |  |  |
| Analysis of Deviance Table (Type III Wald chisquare tests) | | | | |
|  | Chisq | Df | Pr(>Chisq) |  |
| (Intercept) | 34.8423 | 1 | 3.58E-09 | *** |
| Temperature | 8.4269 | 1 | 0.003697 | ** |
| Day extension | 35.7007 | 3 | 8.66E-08 | *** |
| Signif. codes: 0 ‘***’ 0.001 ‘**’ 0.01 ‘*’ 0.05 ‘.’ 0.1 ‘ ’ 1 | | | | |

**Table S4.** Two-way ANOVA tables for study of effect of day extension with A) far red, red or red: far-red ratio 0.5, 1 or 2 (experiment 3) and B) far-red, red or red: far-red ratio 0.1, 0.2 or 0.5 (experiment 4) from light emitting diodes (LEDs) and short days (SD: no day extension) on terminal bud stages in a time course in *Abies lasiocarpa* seedlings grown under 18 or 24 °C (results shown in Figure 4). Bud stage 0 = growing shoot tip (no presence of bud), 1 = green bud, 2 = brown bud. A generalized linear model was applied using the time within each individual plant as random effect. n=17 plants per treatment.

| A) Analysis of Deviance Table (Type III Wald chisquare tests) | | | | |
| --- | --- | --- | --- | --- |
|  | Chisq | Df | Pr(>Chisq) |  |
| (Intercept) | 5.8498 | 1 | 0.0155786 | * |
| Temperature | 0.0156 | 1 | 0.9005482 |  |
| Day extension | 28.8077 | 5 | 2.53E-05 | *** |
| Temperature: Day extension | 20.9846 | 5 | 8.16E-04 | *** |
|  |  |  |  |  |
| B) Analysis of Deviance Table (Type III Wald chisquare tests) | | | | |
|  | Chisq | Df | Pr(>Chisq) |  |
| (Intercept) | 146.9595 | 1 | 2.20E-16 | *** |
| Temperature | 8.7013 | 1 | 3.18E-03 | ** |
| Day extension | 31.9825 | 5 | 5.99E-06 | *** |
| Temperature: Day extension | 17.9033 | 5 | 0.00307 | ** |
| Signif. codes: 0 ‘***’ 0.001 ‘**’ 0.01 ‘*’ 0.05 ‘.’ 0.1 ‘ ’ 1 | | | |  |

**Table S5.** Two-way ANOVA tables for study of effect of day extension with red, far-red or blue light from light emitting diodes (LEDs) and short days (SD: no day extension) on terminal bud burst in a time course in *Abies lasiocarpa* seedlings grown under 18 or 24 °C (experiment 2) for 50 days before transfer to long days at 18 °C (conditions as before start of the treatments) (results shown in Figure 5). 0 = growing shoot tip, 1 = bud burst, 2 = presence of terminal bud. A generalized linear model was applied using the time within each individual plant as random effect. Since there was no significant interaction, the interaction term was omitted from the analysis. n=10-19 plants per treatment (the plants with buds in experiment 2).

| Analysis of Deviance Table (Type III Wald chisquare tests) | | | | |
| --- | --- | --- | --- | --- |
|  | Chisq | Df | Pr(>Chisq) |  |
| (Intercept) | 415.1989 | 1 | < 2e-16 *** |  |
| Temperature | 5.0859 | 1 | 0.02412 * |  |
| Day extension | 1.2964 | 3 | 0.01701 * |  |
| Signif. codes: 0 ‘***’ 0.001 ‘**’ 0.01 ‘*’ 0.05 ‘.’ 0.1 ‘ ’ 1 | | | | |

**Table S6.** Two-way ANOVA tables for study of effect of day extension with red, far-red or blue light from light emitting diodes and short days (SD: no day extension) on presence/absence of terminal buds in a time course in *Abies lasiocarpa* seedlings grown under A) 18 or 22 °C (experiment 1) and B) 18 or 24 °C (experiment 2) (results shown in Figure S1). A generalized linear model was applied using the time within each individual plant as random effect. A) n=16-19 plants, B) n=19 plants per treatment.

| A) Analysis of Deviance Table (Type III Wald chisquare tests) | | | | |
| --- | --- | --- | --- | --- |
|  | Chisq | Df | Pr(>Chisq) |  |
| (Intercept) | 5.8498 | 1 | 0.0155786 | * |
| Temperature | 0.0156 | 1 | 0.9005482 |  |
| Day extension | 28.8077 | 5 | 2.53E-05 | *** |
| Temperature: Day extension | 20.9846 | 5 | 8.16E-04 | *** |
|  |  |  |  |  |
| B) Analysis of Deviance Table (Type III Wald chisquare tests) | | | | |
|  | Chisq | Df | Pr(>Chisq) |  |
| (Intercept) | 146.9595 | 1 | 2.20E-16 | *** |
| Temperature | 8.7013 | 1 | 3.18E-03 | ** |
| Day extension | 31.9825 | 5 | 5.99E-06 | *** |
| Temperature: Day extension | 17.9033 | 5 | 0.00307 | ** |
| Signif. codes: 0 ‘***’ 0.001 ‘**’ 0.01 ‘*’ 0.05 ‘.’ 0.1 ‘ ’ 1 | | | |  |

**Table S7.** Two-way ANOVA tables for study of effect of day extension with A) far red, red or red: far-red ratio 0.5, 1 or 2 (experiment 3) and B) far-red, red or red: far-red ratio 0.1, 0.2 or 0.5 (experiment 4) from light emitting diodes (LEDs) and short days (SD: no day extension) on presence/absence of terminal buds in a time course in *Abies lasiocarpa* seedlings grown under 18 or 24 °C (results shown in Figure S2). A generalized linear model was applied using the time within each individual plant as random effect. n=17 plants per treatment.

| A) Analysis of Deviance Table (Type III Wald chisquare tests) | | | | |
| --- | --- | --- | --- | --- |
|  | Chisq | Df | Pr(>Chisq) |  |
| (Intercept) | 49.8432 | 1 | 1.67E-12 | *** |
| Temperature | 1.2648 | 1 | 0.260745 |  |
| Day extension | 87.6739 | 5 | 2.20E-16 | *** |
| Temperature: Day extension | 20.1017 | 5 | 1.20E-03 | ** |
|  |  |  |  |  |
| B) Analysis of Deviance Table (Type III Wald chisquare tests) | | | | |
|  | Chisq | Df | Pr(>Chisq) |  |
| (Intercept) | 48.9856 | 1 | 2.58E-12 | *** |
| Temperature | 6.4365 | 1 | 0.01118 | * |
| Day extension | 15.3265 | 5 | 9.06E-03 | ** |
| Temperature: Day extension | 14.84 | 5 | 1.11E-02 | * |
| Signif. codes: 0 ‘***’ 0.001 ‘**’ 0.01 ‘*’ 0.05 ‘.’ 0.1 ‘ ’ 1 | | | |  |

**Table S8.** Two-way ANOVA tables for study of effect of day extension with red, far-red or blue light from light emitting diodes (LEDs) and short days (SD: no day extension) on terminal bud burst (presence/absence of buds) in a time course in *Abies lasiocarpa* seedlings grown under 18 or 24 °C (experiment 2) for 50 days before transfer to long days at 18 °C (conditions as before start of the treatments) (results shown in Figure S3). A generalized linear model was applied using the time within each individual plant as random effect. Since there was no significant interaction, the interaction term was omitted from the analysis. n=10-19 plants per treatment (the plants with buds in experiment 2).

| Analysis of Deviance Table (Type III Wald chisquare tests) | | | | |
| --- | --- | --- | --- | --- |
|  | Chisq | Df | Pr(>Chisq) |  |
| (Intercept) | 99.467 | 1 | < 2.2e-16 *** |  |
| Temperature | 11.228 | 1 | 0.0008056 *** |  |
| Day extension | 40.692 | 3 | 7.601e-09 *** |  |
| Signif. codes: 0 ‘***’ 0.001 ‘**’ 0.01 ‘*’ 0.05 ‘.’ 0.1 ‘ ’ 1 | | | | |
